# Supplementary material for: Evaluation of Carotenoids Accumulation and Biosynthesis in Two Genotypes of Pomelo (Citrus maxima) during Early Fruit Development
Source: MDPI journal article supplement (doi:10.3390/molecules26165054), 2021-08-20
Supplement: s1 [file s1]

Table S1. Primer sequence of related genes for Real-Time PCR

| Gene Name     | Gene ID      | Prime Direction | Primer Sequence 5'-3' |
|---------------|--------------|-----------------|-----------------------|
| <i>CRTISO</i> | LOC18043114  | Forward         | TCCAAAGTCCTACCGAGAT   |
|               |              | Reverse         | GGTCCCAGTCATTACACAAC  |
| <i>GGPPS</i>  | LOC18042186  | Forward         | TTCCACTTCCACATCCTGCTA |
|               |              | Reverse         | TCGCCACTGACTGACTTCCT  |
| <i>LCYB</i>   | LOC18031713  | Forward         | GGTTCTTGATGCTACGGGATT |
|               |              | Reverse         | CAAACGGGTGCTCTTCTAC   |
| <i>LCYE</i>   | LOC18056072  | Forward         | AAAGCATTACGGAATCTAC   |
|               |              | Reverse         | GGACAGAAACTTTGGGAC    |
| <i>LUT5</i>   | LOC18039008  | Forward         | GGAGCTGCAGTTTCATGAGG  |
|               |              | Reverse         | ACTGCAGCTGATGTTTCGTG  |
| <i>PDS</i>    | LOC18034521  | Forward         | CTGGATTACAACCCGGCATG  |
|               |              | Reverse         | AATCTTCTGTTGACGGTGCG  |
| <i>PSY</i>    | LOC18039146  | Forward         | TGGAGAAGTGGCCATGTCTT  |
|               |              | Reverse         | CGCAAACCTTCTCCACAACGA |
| <i>ZDS</i>    | LOC112098231 | Forward         | ACAGAGAAGGGCAAGGTTC   |
|               |              | Reverse         | AGGTCCCTCACGGTACAAAG  |
| <i>ZISO</i>   | LOC18046078  | Forward         | GGGAAACTGGGGTCATGAGA  |
|               |              | Reverse         | GTTCGCCTCTTCACAGCTTC  |
| <i>ACTIN</i>  | LOC18038212  | Forward         | GCTATCCAGGCTGTGCTTTC  |
|               |              | Reverse         | AACAATTTCCCGCTCAGCAG  |
